# Supplementary material for: Efficient blue light-emitting diodes based on a classical “push–pull” architecture molecule 4,4′-di-(2-(2,5-dimethoxyphenyl)ethenyl)-2,2′-bipyridine
Source: Royal Society of Chemistry journal article supplement (doi:10.1039/b610880f), 2006-01-01
Supplement: b610880f.pdf [file b610880f.pdf]

**Efficient Blue Light-Emitting Diodes Based on A classical “Push-Pull”  
Architecture Molecule 4,4'-di-(2-(2,5-dimethoxyphenyl)ethenyl)-2,2'-  
Bipyridine**

D. Berner,<sup>1</sup> C. Klein, Md. K. Nazeeruddin,\* F. De Angelis,<sup>2</sup> M. Castellani,<sup>3</sup> Ph. Bugnon,<sup>3</sup>  
R. Scopelliti, L. Zuppiroli,<sup>3</sup> and M. Graetzel

Laboratory for Photonics and Interfaces, Institute of Chemical Sciences and Engineering,  
School of basic Sciences, Swiss Federal Institute of Technology,  
CH - 1015 Lausanne, Switzerland

E-Mail: [MdKhaja.Nazeeruddin@epfl.ch](mailto:MdKhaja.Nazeeruddin@epfl.ch),

---

<sup>1</sup> CFG Microelectronic, CH-1110 Morges, Switzerland.

<sup>2</sup> Istituto CNR di Scienze e Tecnologie Molecolari (ISTM-CNR), c/o Dipartimento di Chimica, Università di Perugia, I-06123, Perugia, Italy

<sup>3</sup> Laboratoire d'Optoélectronique des matériaux moléculaires, Institut des Matériaux, Ecole Polytechnique Fédérale, CH-1015 Lausanne, Switzerland.

## Supporting Information

Crystal data and structure refinement for N945L.

|                                   |                                                               |                 |
|-----------------------------------|---------------------------------------------------------------|-----------------|
| Identification code               | N945L                                                         |                 |
| Empirical formula                 | C <sub>30</sub> H <sub>28</sub> N <sub>2</sub> O <sub>4</sub> |                 |
| Formula weight                    | 480.54                                                        |                 |
| Temperature                       | 140(2) K                                                      |                 |
| Wavelength                        | 0.71073 Å                                                     |                 |
| Crystal system                    | Monoclinic                                                    |                 |
| Space group                       | P2(1)/n                                                       |                 |
| Unit cell dimensions              | a = 7.6670(8) Å                                               | α = 90°.        |
|                                   | b = 13.7182(13) Å                                             | β = 99.379(7)°. |
|                                   | c = 11.7334(8) Å                                              | γ = 90°.        |
| Volume                            | 1217.60(19) Å <sup>3</sup>                                    |                 |
| Z                                 | 2                                                             |                 |
| Density (calculated)              | 1.311 Mg/m <sup>3</sup>                                       |                 |
| Absorption coefficient            | 0.087 mm <sup>-1</sup>                                        |                 |
| F(000)                            | 508                                                           |                 |
| Crystal size                      | 0.14 x 0.12 x 0.08 mm <sup>3</sup>                            |                 |
| Theta range for data collection   | 3.08 to 25.02°.                                               |                 |
| Index ranges                      | -9<=h<=8, -16<=k<=16, -13<=l<=13                              |                 |
| Reflections collected             | 7148                                                          |                 |
| Independent reflections           | 2091 [R(int) = 0.0426]                                        |                 |
| Completeness to theta = 25.02°    | 97.4 %                                                        |                 |
| Absorption correction             | Semi-empirical from equivalents (MULABS)                      |                 |
| Max. and min. transmission        | 0.9974 and 0.9588                                             |                 |
| Refinement method                 | Full-matrix least-squares on F <sup>2</sup>                   |                 |
| Data / restraints / parameters    | 2091 / 0 / 163                                                |                 |
| Goodness-of-fit on F <sup>2</sup> | 0.865                                                         |                 |
| Final R indices [I>2sigma(I)]     | R1 = 0.0349, wR2 = 0.0630                                     |                 |
| R indices (all data)              | R1 = 0.0873, wR2 = 0.0740                                     |                 |
| Largest diff. peak and hole       | 0.145 and -0.133 e.Å <sup>-3</sup>                            |                 |

Table S1: Comparison between main optimized geometrical parameters (Å, °) and X-ray data for the N945L ligand.

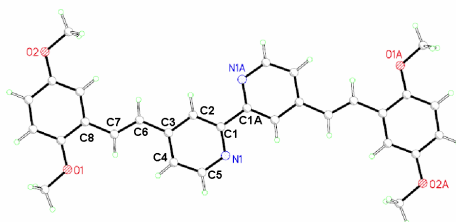

| Parameter         | X-ray | Theor. (2-5) | Theor. (3-4) |
|-------------------|-------|--------------|--------------|
| $d_{(C1-C1A)}$    | 1.494 | 1.491        | 1.491        |
| $d_{(C1-C2)}$     | 1.386 | 1.399        | 1.400        |
| $d_{(C2-C3)}$     | 1.396 | 1.403        | 1.403        |
| $d_{(C1-N1)}$     | 1.350 | 1.345        | 1.345        |
| $d_{(N1-C5)}$     | 1.349 | 1.338        | 1.338        |
| $d_{(C4-C5)}$     | 1.375 | 1.390        | 1.390        |
| $d_{(C3-C4)}$     | 1.400 | 1.408        | 1.408        |
| $d_{(C3-C6)}$     | 1.466 | 1.464        | 1.464        |
| $d_{(C6-C7)}$     | 1.334 | 1.350        | 1.350        |
| $d_{(C7-C8)}$     | 1.463 | 1.463        | 1.436        |
| $a_{(C1A-C1-N1)}$ | 116.4 | 117.0        | 117.0        |
| $a_{(C1A-C1-C2)}$ | 121.2 | 120.5        | 120.5        |
| $a_{(C1-N1-C5)}$  | 116.3 | 117.2        | 117.2        |
| $a_{(C1-C2-C3)}$  | 121.1 | 120.3        | 120.3        |
| $a_{(C2-C3-C6)}$  | 120.0 | 119.3        | 119.1        |
| $a_{(C3-C6-C7)}$  | 126.7 | 126.1        | 126.4        |
| $a_{(C6-C7-C8)}$  | 127.3 | 126.6        | 127.4        |

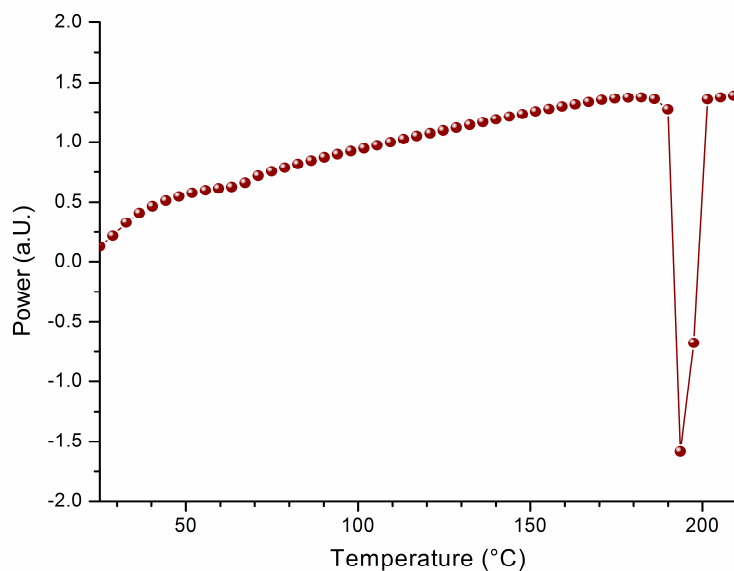

Figure S1: Differential scanning calorimeter trace of N945L.

**Reference** [24]: R. B. Gaussian 03, M. J. Frisch, G. W. Trucks, H. B. Schlegel, G. E. Scuseria, M. A. Robb, J. R. Cheeseman, J. A. Montgomery, Jr., T. Vreven, K. N. Kudin, J. C. Burant, J. M. Millam, S. S. Iyengar, J. Tomasi, V. Barone, B. Mennucci, M. Cossi, G. Scalmani, N. Rega, G. A. Petersson, H. Nakatsuji, M. Hada, M. Ehara, K. Toyota, R. Fukuda, J. Hasegawa, M. Ishida, T. Nakajima, Y. Honda, O. Kitao, H. Nakai, M. Klene, X. Li, J. E. Knox, H. P. Hratchian, J. B. Cross, C. Adamo, J. Jaramillo, R. Gomperts, R. E. Stratmann, O. Yazyev, A. J. Austin, R. Cammi, C. Pomelli, J. W. Ochterski, P. Y. Ayala, K. Morokuma, G. A. Voth, P. Salvador, J. J. Dannenberg, V. G. Zakrzewski, S. Dapprich, A. D. Daniels, M. C. Strain, O. Farkas, D. K. Malick, A. D. Rabuck, K. Raghavachari, J. B. Foresman, J. V. Ortiz, Q. Cui, A. G. Baboul, S. Clifford, J., *Gaussian, Inc.: Pittsburgh PA 2003*.
